# Supplementary material
Source: PubMed Central journal article supplement (PMC3910899)
Supplement: AAC.02190-13_zac002142601so1.pdf [file AAC.02190-13_zac002142601so1.pdf]

Figure S1

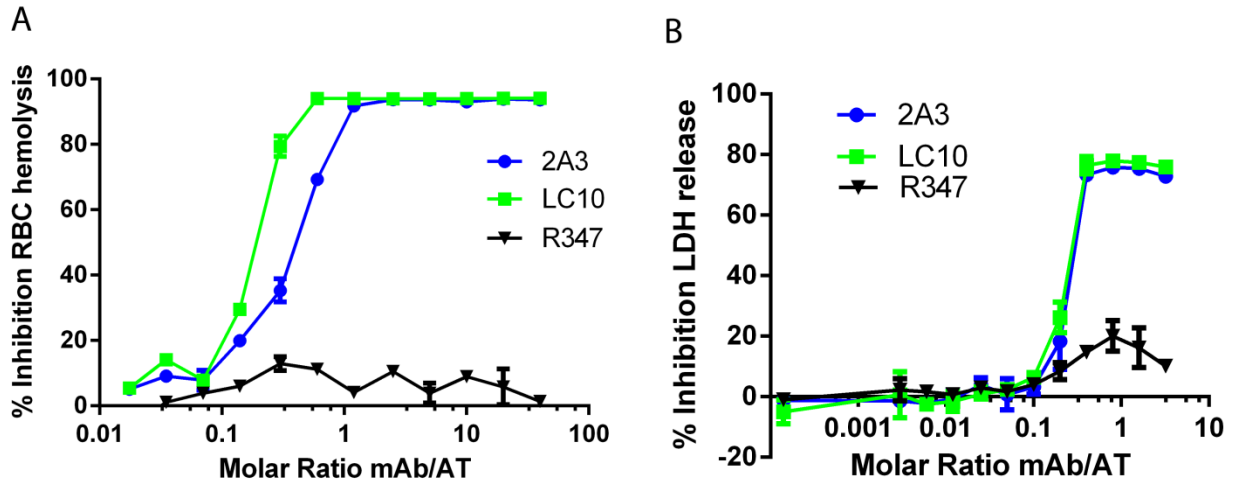

**Figure S1. LC10 neutralizes AT-mediated red blood cell and A549 cell lysis with similar potency as 2A3.** **A.** Purified anti-AT mAbs were titrated in a hemolytic assay in the presence of constant quantities of nAT and rabbit RBC. Hemolysis was measured by the hemoglobin release into the supernatant. % hemolysis inhibition was calculated: % inhibition =  $100 - [100 \times ((A_{450} \text{ nAT+ Ab}) / (A_{450} \text{ nAT no Ab}))]$ . **B.** Purified anti-AT mAbs were titrated in a cytolytic assay in the presence of constant quantities of nAT and A549 cells (alveolar epithelial cell line). Lysis was measured by release of lactate dehydrogenase (LDH) into the supernatant. % lysis inhibition was calculated: % inhibition =  $100 - [100 \times ((A_{590} \text{ nAT+ mAb}) / (A_{590} \text{ nAT no mAb}))]$ .

Figure S2

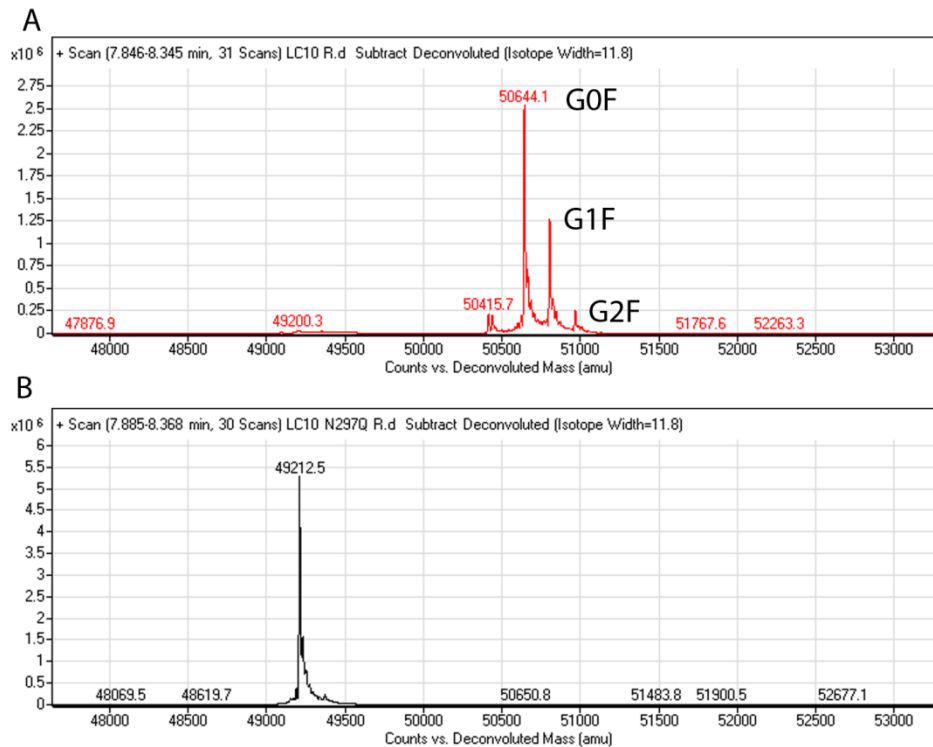

**Figure S2. LC10<sub>N297Q</sub> heavy chain is aglycosylated.** LC10 and LC10<sub>N297Q</sub> (10  $\mu$ g) were diluted to 1 mg/ml in PBS and incubated with 50 mM DTT (final concentration) for 30 minutes at 37°C. Reduced samples were injected onto a 50 x 2.1mm PRLP-S polymer column (8  $\mu$ m, 1000A, Agilent Technology) and separated by a 25-50% linear acetonitrile gradient in 0.05% trifluoroacetic acid (TFA) and water. Eluted proteins were monitored at 280nm wavelength and intact mass of each peak was identified by Time-of-Flight (TOF) mass spectrometer (6210 TOF LC/MS, Agilent Technology) with a dual-nebulizer electrospray ion source. Data were collected by the Agilent MassHunter Work station data acquisition software and deconvoluted with Agilent MassHunter Qualitative Analysis Software. **A.** Heavy chain mass spectrum of LC10 demonstrated the protein was predominantly glycosylated with G0F, G1F and G2F glycans. **B.** LC10<sub>N297Q</sub> heavy chain mass spectrum showed the protein was predominantly aglycosylated.

Figure S3

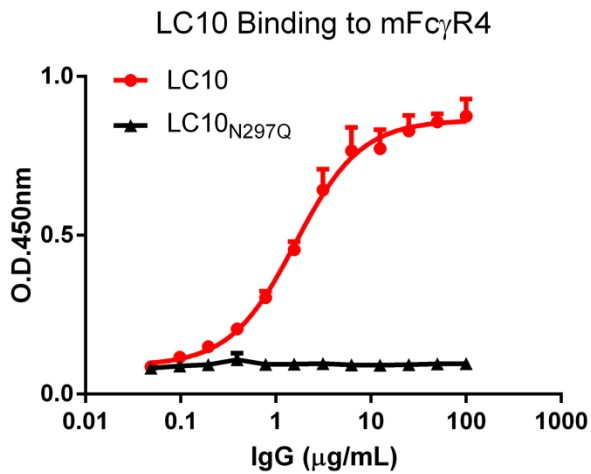

**Figure S3. LC10<sub>N297Q</sub> is defective for binding to murine Fc $\gamma$ RIV (mFc $\gamma$ RIV).** LC10<sub>N297Q</sub> binding to a mouse activating Fc $\gamma$  receptor, mFc $\gamma$ RIV was assessed by ELISA. Murine Fc $\gamma$ RIV (100  $\mu\text{g/mL}$ ) was coated on 96-well ELISA plate and blocked with 3% BSA in PBS. The plate was then incubated with 2-fold serial dilutions (100  $\mu\text{g/mL}$  to 0.05  $\mu\text{g/mL}$ ) of either LC10 or LC10<sub>N297Q</sub>. Antibody binding was detected with a horseradish peroxidase conjugated goat anti-human kappa light chain IgG (1:5,000). LC10 binds to Fc $\gamma$ RIV in a concentration dependent manner however LC10<sub>N297Q</sub> exhibits no binding over the concentration range tested.
